# Supplementary material for: “Water-in-Salt” electrolytes enable green and safe Li-ion batteries for large scale electric energy storage applications
Source: Royal Society of Chemistry journal article supplement (doi:10.1039/c6ta00451b), 2016-01-01
Supplement: c6ta00451b1.pdf [file c6ta00451b1.pdf]

## Supporting information

### **“Water-in-Salt” electrolyte enables green and safe Li-ion batteries for large scale electric energy storage applications**

Liumin Suo,<sup>a</sup> Fudong Han,<sup>a</sup> Xiulin Fan,<sup>a</sup> Huili Liu,<sup>a</sup> Kang Xu\* and Chunsheng Wang\*

a. Department of Chemical and Biomolecular Engineering, University of Maryland College Park, Maryland, 20740, USA. E-mail: cswang@umd.edu

b. Electrochemistry Branch, Sensor and Electron Devices Directorate, Power and Energy Division U.S. Army Research Laboratory Adelphi, Maryland, 20783, USA, E-mail: conrad.k.xu.civ@mail.mil

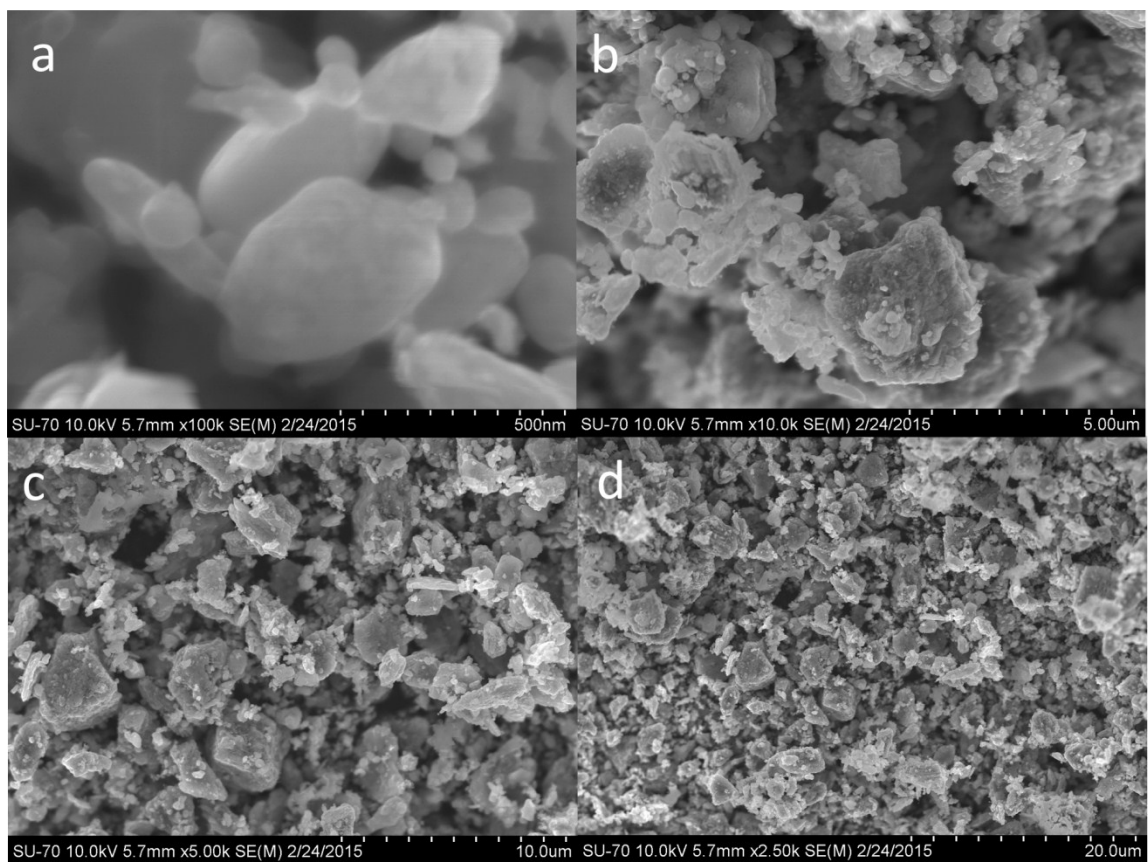

Figure S1 SEM image of  $\text{LiFePO}_4$  powder

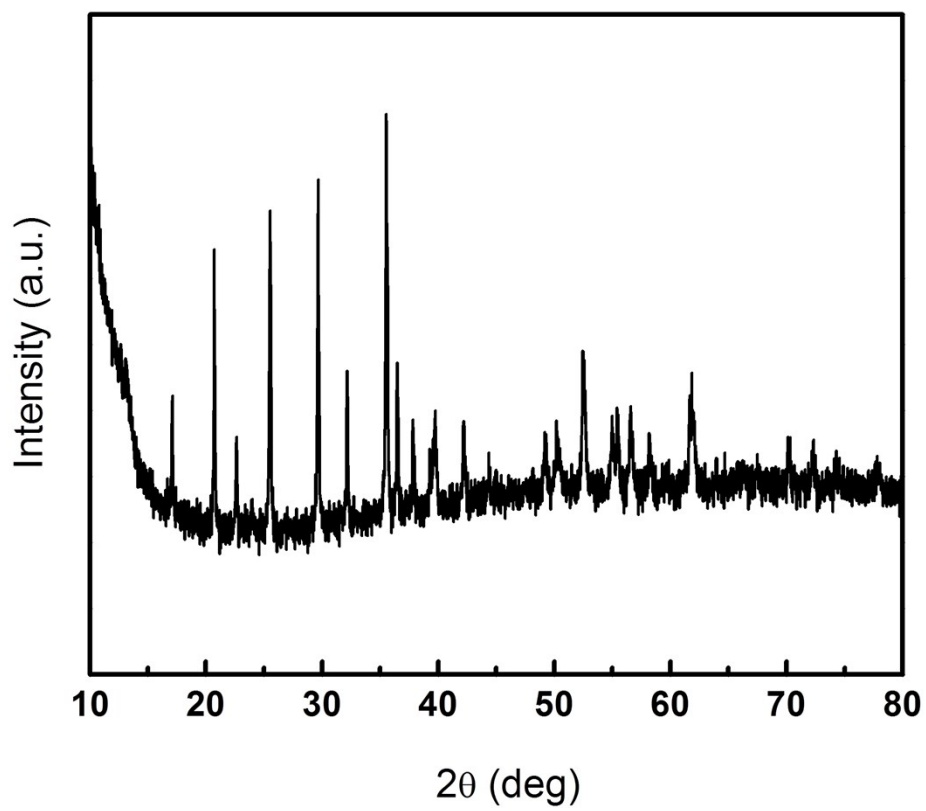

Figure S2. XRD pattern of LiFePO<sub>4</sub> powder

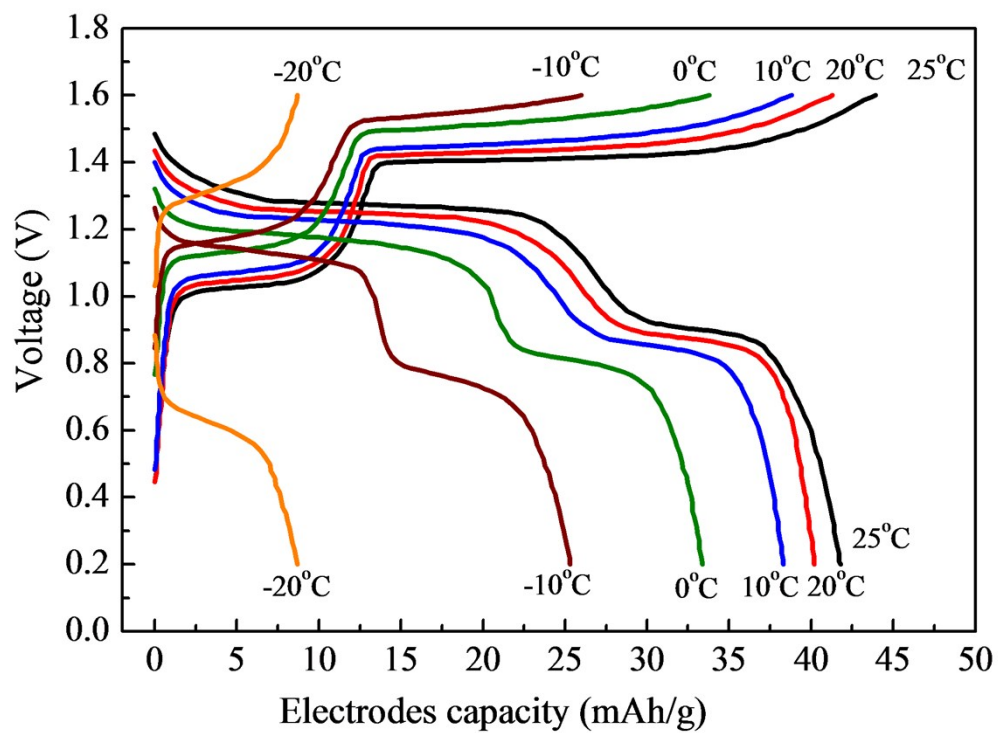

Figure S3. Charge-Discharge profiles of full cell dependent on temperature (the temperature variation is from 25°C to -20°C).
